# Supplementary material for: Metabolomics Reveals Rubiadin Accumulation and the Effects of Methyl Jasmonate Elicitation in Damnacanthus major Calli
Source: MDPI journal article supplement (doi:10.3390/plants13020167), 2024-01-08
Supplement: s1 [file s1]

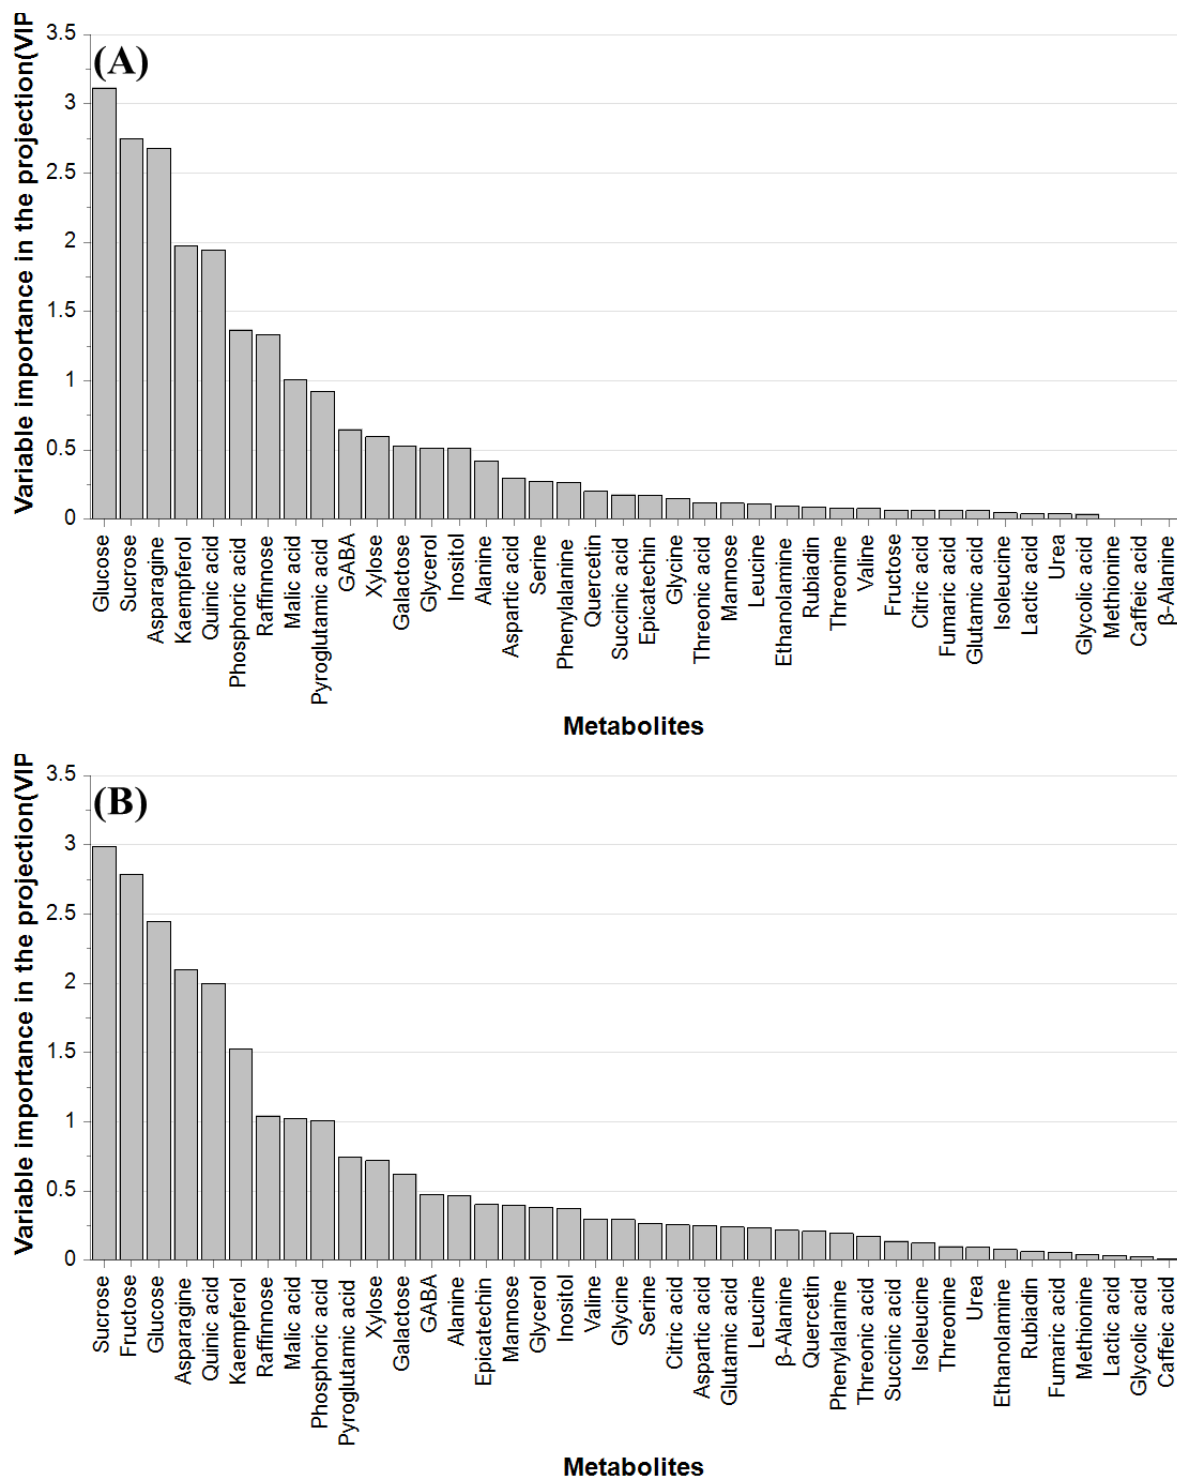

**Figure S1.** The influence of variables in projection plots displaying contributed metabolites to construct partial least squares (PLS) 1 (A) and 2 (B) from partial least squares discriminant analysis (PLS-DA) results obtained from leaves and calli treated with different methyl jasmonate (MeJA) concentrations

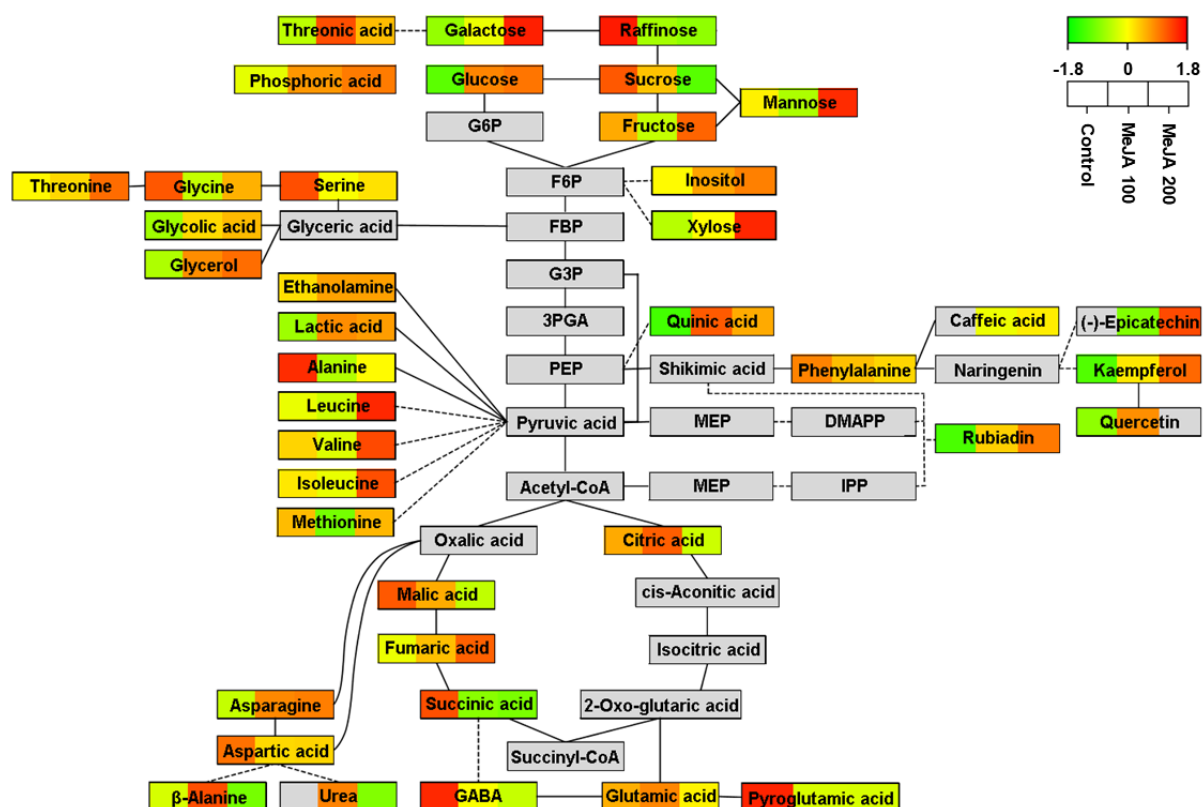

**Figure S2.** Metabolic pathways of *D. major* calli treated with various methyl jasmonate (MeJA) concentrations. Metabolite differences are visualized as the scaling factor ranges from -1.8 to 1.8. A scaling value above zero represents higher than average levels in each value of the control, MeJA 100  $\mu$ M-treated calli, and MeJA 200  $\mu$ M-treated calli, and is colored by the red color intensity. A scaling value below zero represents lower than the average levels and is indicated by green color intensity. Gray color represents not detected metabolites.

**Table S1.** Composition and content (ratio/g) of low-molecular hydrophilic compounds in *D. major* leaves and calli treated with different methyl jasmonate (MeJA) concentrations.

| Compounds                 | Leaves             | Unelicited         | Elicited           |                    |
|---------------------------|--------------------|--------------------|--------------------|--------------------|
|                           |                    | Control            | MeJA 100           | MeJA 200           |
| Amino acids               |                    |                    |                    |                    |
| Alanine                   | 5.706 ± 1.431      | 70.169 ± 15.24     | 16.741 ± 2.033     | 31.648 ± 4.085     |
| Asparagine                | 1.896 ± 0.449      | 1097.804 ± 259.299 | 2581.31 ± 550.039  | 2671.850 ± 243.076 |
| Aspartic acid             | 2.256 ± 0.284      | 75.391 ± 3.940     | 54.379 ± 5.150     | 55.540 ± 6.360     |
| GABA                      | 40.105 ± 2.525     | 160.538 ± 6.091    | 88.867 ± 7.346     | 71.662 ± 7.447     |
| Glutamic acid             | 1.257 ± 0.325      | 27.913 ± 7.048     | 31.552 ± 6.172     | 21.619 ± 3.276     |
| Glycine                   | 0.765 ± 0.155      | 21.365 ± 0.408     | 8.196 ± 1.158      | 16.122 ± 2.249     |
| Isoleucine                | 0.774 ± 0.379      | 3.181 ± 0.187      | 2.653 ± 0.619      | 5.029 ± 1.281      |
| Leucine                   | 0.471 ± 0.265      | 4.086 ± 0.535      | 3.291 ± 0.883      | 10.781 ± 1.418     |
| Methionine                | *N.D.              | 1.292 ± 0.049      | 1.005 ± 0.156      | 1.300 ± 0.219      |
| Phenylalanine             | 1.649 ± 0.077      | 76.978 ± 1.965     | 64.196 ± 6.594     | 59.271 ± 4.918     |
| Pyroglutamic acid         | 2.878 ± 1.542      | 250.197 ± 40.371   | 75.168 ± 5.143     | 73.805 ± 2.462     |
| Serine                    | 0.918 ± 0.382      | 41.91 ± 1.444      | 22.026 ± 2.505     | 25.726 ± 4.983     |
| Threonine                 | 0.824 ± 0.268      | 5.348 ± 1.606      | 6.119 ± 1.255      | 8.600 ± 2.598      |
| Valine                    | 1.517 ± 0.550      | 12.535 ± 1.103     | 8.966 ± 0.908      | 19.106 ± 0.984     |
| β-Alanine                 | N.D.               | 7.760 ± 0.176      | 11.071 ± 0.787     | 6.296 ± 0.323      |
| Organic acids             |                    |                    |                    |                    |
| Citric acid               | 2.565 ± 0.287      | 12.482 ± 0.184     | 15.202 ± 0.082     | 7.684 ± 0.129      |
| Fumaric acid              | 0.502 ± 0.203      | 1.868 ± 0.060      | 2.481 ± 0.295      | 3.191 ± 0.300      |
| Glycolic acid             | 1.488 ± 0.814      | 1.221 ± 0.197      | 1.632 ± 0.243      | 1.733 ± 0.306      |
| Lactic acid               | 0.919 ± 0.231      | 0.968 ± 0.227      | 1.550 ± 0.430      | 1.505 ± 0.211      |
| Malic acid                | 13.794 ± 1.489     | 434.075 ± 13.652   | 333.995 ± 17.559   | 162.101 ± 8.805    |
| Quinic acid               | 373.541 ± 44.299   | 21.653 ± 0.446     | 998.035 ± 63.116   | 777.675 ± 29.351   |
| Succinic acid             | 10.244 ± 1.720     | 12.424 ± 0.537     | 6.096 ± 0.703      | 5.784 ± 0.487      |
| Threonic acid             | 0.874 ± 0.136      | 3.512 ± 0.791      | 9.531 ± 1.348      | 6.832 ± 0.481      |
| Urea                      | N.D.               | N.D.               | 3.575 ± 0.245      | 2.169 ± 0.244      |
| Sugars and sugar alcohols |                    |                    |                    |                    |
| Fructose                  | 552.877 ± 44.456   | 1606.005 ± 387.777 | 1031.473 ± 64.484  | 1886.648 ± 111.188 |
| Galactose                 | 12.775 ± 0.918     | 11.194 ± 0.633     | 33.587 ± 9.758     | 95.657 ± 11.519    |
| Glucose                   | 1428.6 ± 180.606   | 975.262 ± 99.936   | 2879.966 ± 439.298 | 2983.979 ± 150.923 |
| Glycerol                  | 12.294 ± 1.405     | 36.208 ± 1.315     | 83.541 ± 6.210     | 91.424 ± 6.290     |
| Inositol                  | 29.171 ± 0.973     | 133.579 ± 5.643    | 174.079 ± 1.547    | 190.520 ± 2.500    |
| Mannose                   | 3.846 ± 0.110      | 13.332 ± 1.011     | 7.463 ± 1.767      | 25.408 ± 1.905     |
| Raffinose                 | 136.884 ± 14.705   | 410.321 ± 16.908   | 70.797 ± 14.930    | 49.551 ± 2.261     |
| Sucrose                   | 2436.117 ± 389.194 | 3945.104 ± 281.663 | 3232.052 ± 715.845 | 1707.375 ± 34.724  |
| Xylose                    | 1.509 ± 0.255      | 29.436 ± 5.061     | 56.294 ± 5.949     | 137.218 ± 8.916    |

|                 |               |                  | <i>Others</i>    |                  |
|-----------------|---------------|------------------|------------------|------------------|
| Ethanolamine    | 6.378 ± 1.182 | 22.427 ± 0.897   | 26.296 ± 5.589   | 26.354 ± 2.671   |
| Phosphoric acid | 5.446 ± 0.501 | 473.446 ± 19.007 | 797.682 ± 65.939 | 870.452 ± 46.314 |

\* N.D. Not detected.

**Table S2.** Composition and content ( $\mu\text{g/g}$ ) of phenolic compounds in *D. major* leaves and calli treated with different methyl jasmonate (MeJA) concentrations.

| Compounds        | Leaves                | Unelicited         | Elicited            |                     |
|------------------|-----------------------|--------------------|---------------------|---------------------|
|                  |                       | Control            | MeJA 100            | MeJA 200            |
| Caffeic acid     | *N.D.                 | N.D.               | 12.851 $\pm$ 0.354  | 13.014 $\pm$ 1.002  |
| Chlorogenic acid | 1699.363 $\pm$ 21.422 | N.D.               | N.D.                | N.D.                |
| Epicatechin      | 33.958 $\pm$ 1.118    | N.D.               | 28.871 $\pm$ 0.481  | 51.713 $\pm$ 4.012  |
| Ferulic acid     | 21.077 $\pm$ 0.14     | N.D.               | N.D.                | N.D.                |
| Kaempferol       | N.D.                  | 66.262 $\pm$ 3.75  | 592.774 $\pm$ 6.625 | 935.772 $\pm$ 9.931 |
| Quercetin        | N.D.                  | 47.035 $\pm$ 0.801 | N.D.                | N.D.                |

\* N.D. Not detected.

**Table S3.** Suitable concentrations of methyl jasmonate (MeJA) in cell cultures of various plants.

| Plant                                    | Materials | MeJA concentration | Reference |
|------------------------------------------|-----------|--------------------|-----------|
| <i>Glycyrrhiza glabra</i>                | Callus    | 100 µM             | [59]      |
| <i>Hypericum perforatum</i>              | Callus    | 100 µM             | [60]      |
| <i>Malus sieversii f. niedzwetzkyana</i> | Callus    | 100 µM             | [61]      |
| <i>Panax ginseng</i>                     | *CSC      | 200 µM             | [62]      |
| <i>Silybum marimum</i>                   | CSC       | 100 µM             | [63]      |
| <i>Morinda citrifolia</i>                | CSC       | 150 µM             | [14]      |
| <i>Panax notoginseng</i>                 | CSC       | 200 µM             | [64]      |
| <i>Eschscholtzia californica</i>         | CSC       | 100 µM             | [65]      |
| <i>Mentha × piperita</i>                 | CSC       | 100 µM             | [22]      |
| <i>Satureja khuzistanica</i>             | CSC       | 100 µM             | [66]      |
| <i>Changium smyrnioides</i>              | CSC       | 100 µM             | [67]      |
| <i>Persicaria minor</i>                  | CSC       | 100 µM             | [68]      |
| <i>Gardenia jasminoides</i>              | CSC       | 200 µM             | [69]      |
| <i>Orostachys cartilaginosa</i>          | CSC       | 100 µM             | [70]      |

\* CSC: Cell suspension culture
